# Supplementary material
Source: Springer Nature journal article supplement (https://www.springermedizin.de/resource/supplementary/12943_2012_1016_MOESM1_ESM.pdf/9552126)

**Fig.S1**

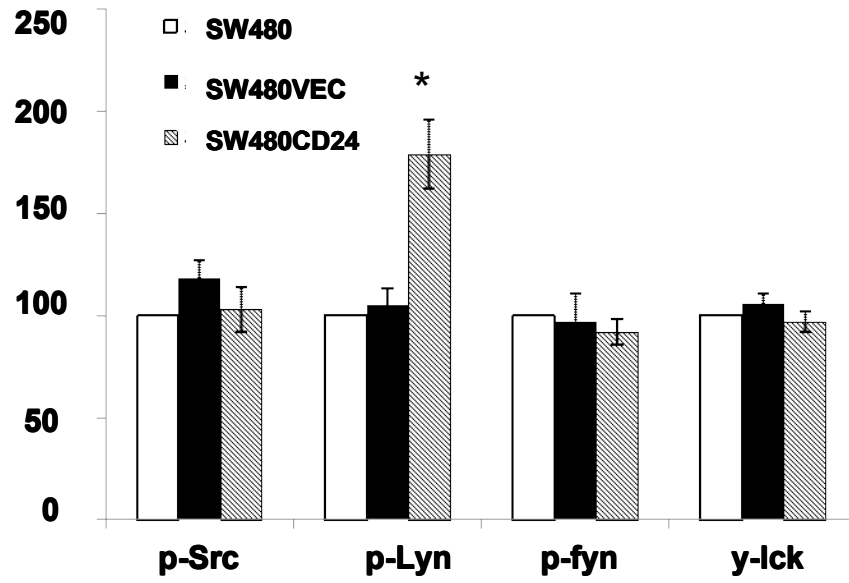

**Fig.S2**

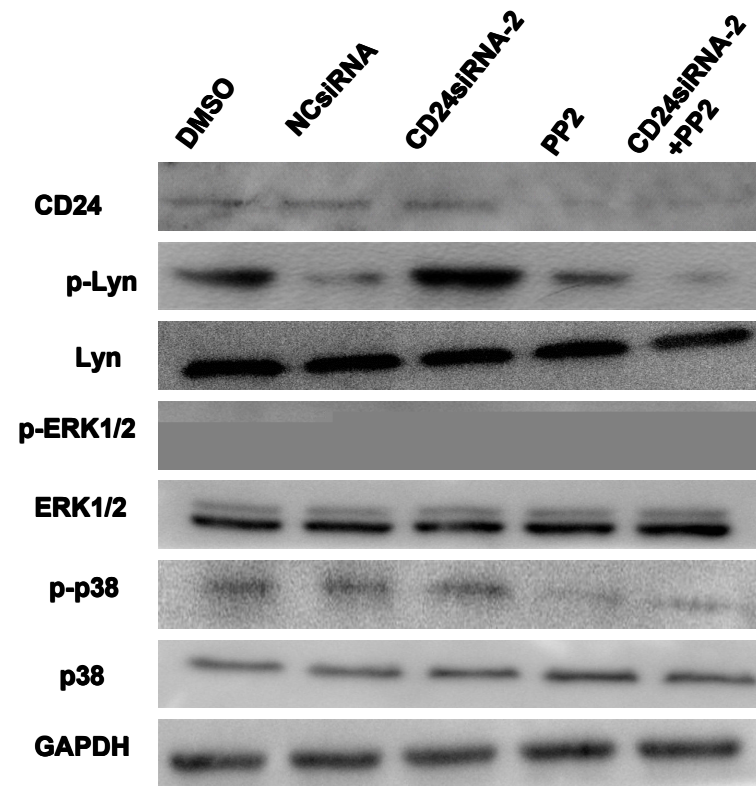

**Fig.S3**

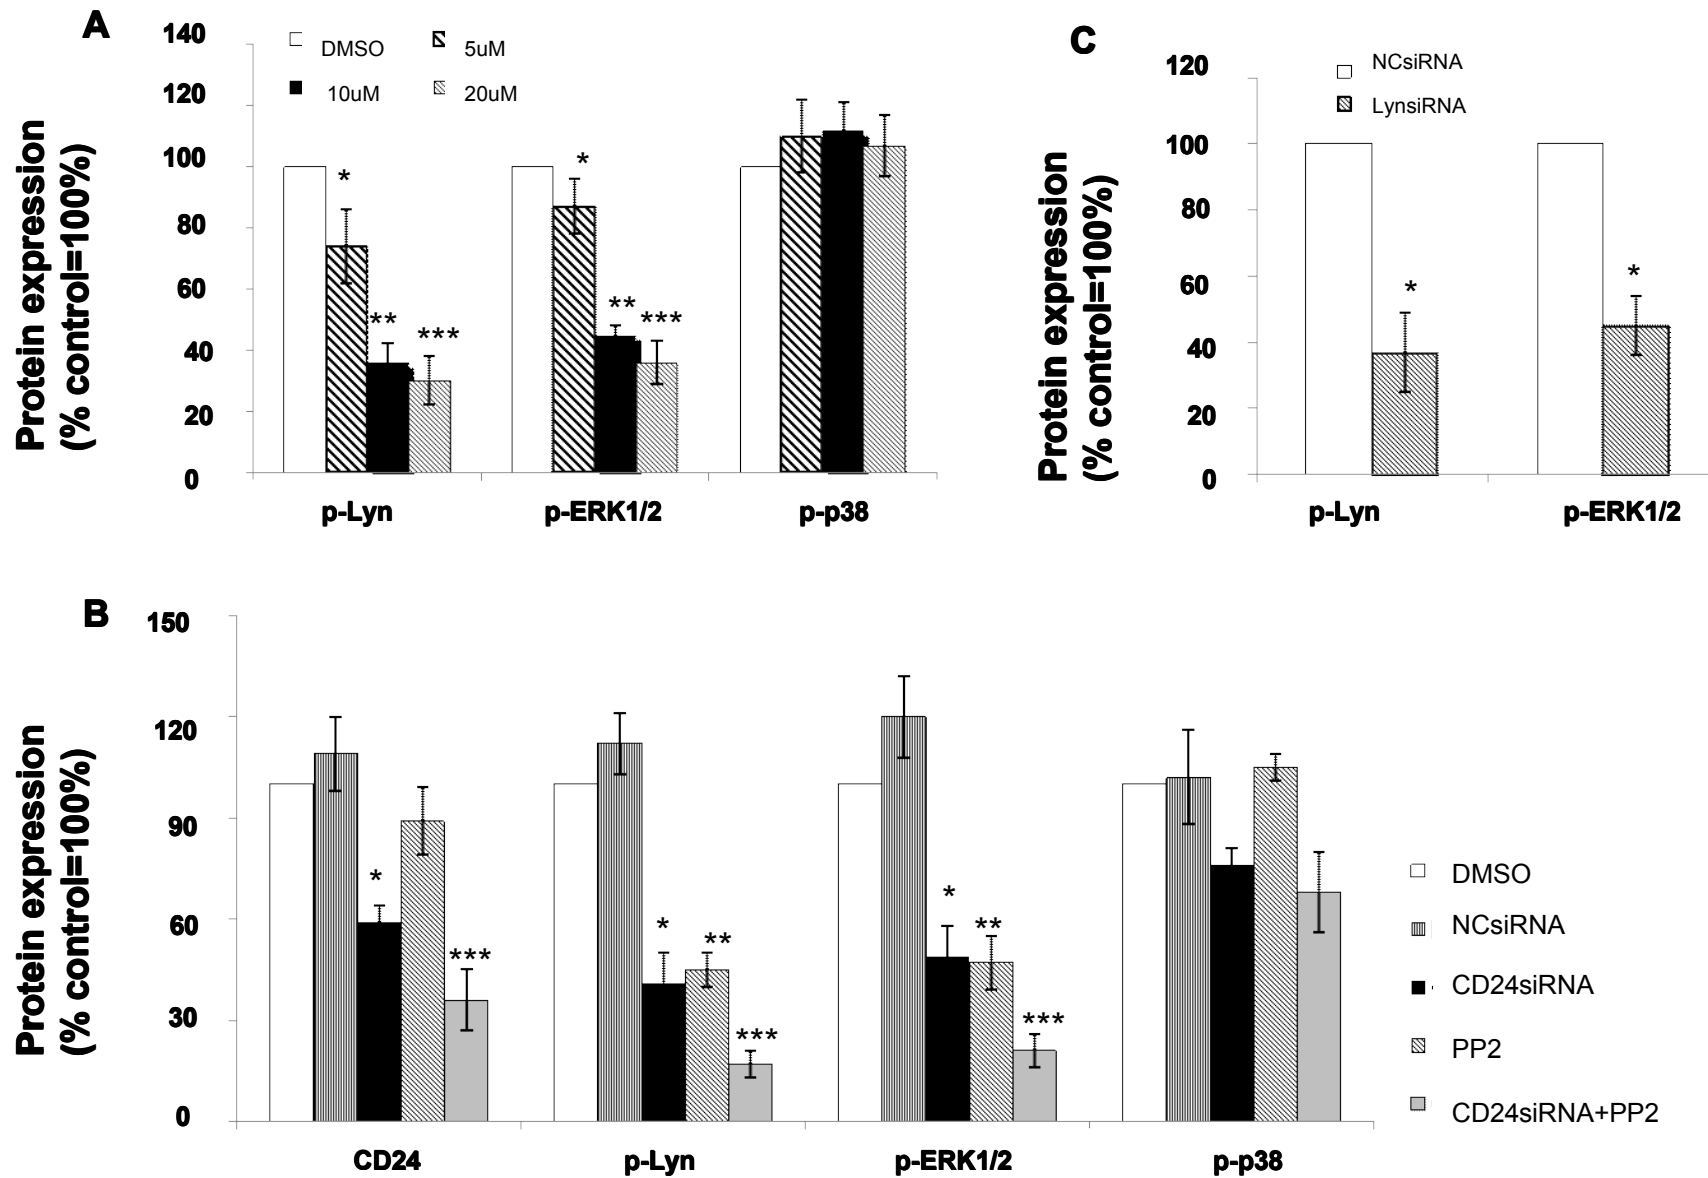

Supplement: MOESM1 [file 9552126]
